# Supplementary material for: De novodesign of a stapled peptide targeting SARS-CoV-2 spike protein receptor-binding domain
Source: Royal Society of Chemistry journal article supplement (doi:10.1039/d3md00222e), 2023-01-01
Supplement: d3md00222e1.pdf [file d3md00222e1.pdf]

## Supplementary material for

### ***De novo* design of stapled peptide targeting SARS-Cov-2 spike protein receptor-binding domain**

Ravindra Thakkar<sup>1\*</sup>, Dilip K Agarwal<sup>2</sup>, Chathuranga B Ranaweera<sup>3</sup>, Susumu Ishiguro<sup>1</sup>, Martin Conda-Sheridan<sup>4</sup>, Natasha N. Gaudreault<sup>5</sup>, Juergen A. Richt<sup>5</sup>, Masaaki Tamura<sup>1</sup> and Jeff Comer<sup>1</sup>.

<sup>1</sup>, Department of Anatomy & Physiology, Kansas State University College of Veterinary Medicine, Man-hattan, Kansas, United States

<sup>2</sup>, Department of Material Science and Engineering and NUANCE Center, Northwestern University, Evanston, Illinois, United States

<sup>3</sup>, Department of Medical Laboratory Sciences, General Sir John Kotelawala Defense University, Colombo, Sri Lanka

<sup>4</sup>, Department of Pharmaceutical Sciences, College of Pharmacy, Universit

y of Nebraska Medical Center, Omaha, Nebraska, United States

<sup>5</sup>, Department of Diagnostic Medicine & Pathobiology, Kansas State University College of Veterinary Medicine, Manhattan, KS.

Corresponding Author: Ravindra Thakkar

Department of Anatomy & Physiology, College of Veterinary Medicine,  
Kansas State University, Manhattan, Kansas, United States

Phone: (785) 210-6108

E-mail: [ravithakkar@vet.k-state.edu](mailto:ravithakkar@vet.k-state.edu)

**Table–S1:** Optimized peptide sequences with Rosetta design score, length of a simulation in which the peptide stayed bound and estimated binding free energy by MM-GBSA method.

| ID | Sequence          | Design score | Time Bound (ns) | Rough Estimate of Binding Energy by MMGBSA (kcal/mol) |
|----|-------------------|--------------|-----------------|-------------------------------------------------------|
| 1  | NSLKELTEKEATDKYYK | -232.95      | 66.6            | +10.845 ± 0.586                                       |
| 2  | SIEELIKKNKKTIEKYK | -99.762      | 321             | -17.274 ± 0.198                                       |
| 3  | EDLKKWAKQLEELKYK  | -237.75      | 198             | -24.442 ± 0.369                                       |
| 4  | YESLLRFLTKLKDDKYK | -240.42      | 67.4            | -12.467 ± 0.396                                       |

|    |                    |         |        |                 |
|----|--------------------|---------|--------|-----------------|
| 5  | AEEEEKKAEDKKYK     | -239.59 | 193.4  | -14.902 ± 0.334 |
| 6  | EEYEKMLESLKELKHYK  | -105.68 | 183.4  | -29.737 ± 0.351 |
| 7  | YTFKEKTDHEATDKYYK  | -230.47 | 13.6   | -03.171 ± 0.669 |
| 8  | YTFEVKEKHKRDIKYYK  | -91.879 | 164.6  | -12.253 ± 0.322 |
| 9  | YTFLKKWAHQAEELKYK  | -229.85 | 231.2  | -36.851 ± 0.518 |
| 10 | YTFLEKFLHKLKDKKYK  | -236.83 | 76.2   | -12.328 ± 0.405 |
| 11 | YTFEAKVKHEQEDKYYK  | -235.7  | 12.8   | -05.877 ± 0.730 |
| 12 | YTFEAKKKHEEELRHYK  | -92.738 | 1032.8 | -28.023 ± 0.178 |
| 13 | SEDLAKWAETLERLKYK  | -230.58 | 131.6  | -21.556 ± 0.449 |
| 14 | NVEKRTKEAKAEDSHYK  | -234.14 | 1572.2 | -30.562 ± 0.164 |
| 15 | SIEELIKRLKKTTEEKYK | -220.31 | 1148.6 | -24.423 ± 0.131 |
| 16 | YDDLEKWKQLEELKYK   | -229.13 | 31.2   | -10.648 ± 0.376 |
| 17 | EEEEKTKKILTELAKYK  | -218.78 | 265.4  | -24.564 ± 0.311 |
| 18 | STEDEEKKAEDSLYK    | -238.36 | 165.8  | -12.937 ± 0.340 |
| 19 | STDQEYKKAVEHDRKYK  | -233.12 | 13.6   | -07.521 ± 0.551 |
| 20 | PDDLKIWAQILLEAFYK  | -232.02 | 2000   | -34.147 ± 0.097 |
| 21 | SIEDKIKKAVVAKYK    | -229.62 | 245.2  | -18.212 ± 0.289 |
| 22 | QTQDEWKKAVEEEKYYK  | -234.59 | 155.8  | -29.358 ± 0.118 |
| 23 | STDDEKKKALAEDQQYK  | -236.3  | 1039.4 | -17.186 ± 0.152 |
| 24 | SELEKALKALSSLSTYK  | -230.04 | 351.8  | -22.292 ± 0.182 |
| 25 | EEEEKKTAKKELDTYK   | -226.02 | 274.6  | -25.472 ± 0.336 |
| 26 | YEELKKWAKTLEEAKYK  | -228.17 | 239.4  | -16.526 ± 0.170 |
| 27 | SLEDLIEEAKRKIEKYK  | -219.24 | 371.2  | -16.070 ± 0.169 |
| 28 | TFLEEWLQKEELKLYK   | -172.52 | 2000   | -28.882 ± 0.092 |
| 29 | TFLELWKRQAKDLRYK   | -181.95 | 435.4  | -21.133 ± 0.240 |
| 30 | TFLEKWLQADDLKNK    | -175.92 | 111    | -22.651 ± 0.477 |
| 31 | DELEITADKLRQAMEK   | -233.77 | 365    | -14.595 ± 0.178 |
| 32 | DELEVLAEQREALAK    | -230.03 | 83.8   | -15.091 ± 0.310 |
| 33 | DPWEIWAKLLKESRDK   | -237.51 | 1421   | -29.714 ± 0.085 |
| 34 | GTEWLYKVKAFVENMS   | NA      | 1350.8 | -29.688 ± 0.122 |
| 35 | STEWLKKVHWKFHAKFS  | NA      | 29.6   | -03.422 ± 0.468 |
| 36 | GTEEIYKRWATVMKXXX  | NA      | 880.2  | -11.344 ± 0.098 |

|    |                     |    |         |                     |
|----|---------------------|----|---------|---------------------|
| 37 | GTEWLKKVWEAFVKNMS   | NA | 189.4   | $-28.698 \pm 0.335$ |
| 38 | GTEEIYLLWMVTVHKQKK  | NA | 151     | $-17.313 \pm 0.471$ |
| 39 | STEYLLKRIFWFMFHEYES | NA | 342     | $-29.252 \pm 0.217$ |
| 40 | NVEKRTKEAKAEDSHYK   | NA | 1253.8  | $-45.021 \pm 0.153$ |
| 41 | QTQDEWKKAVEEEKKYK   | NA | 1014.12 | $-23.381 \pm 0.116$ |

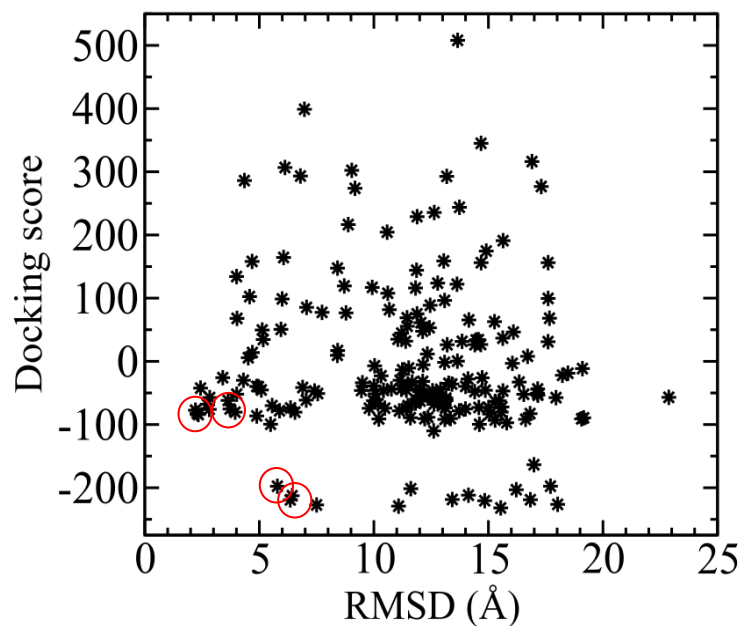

**Figure–S1** Docking score versus RMSD plot for docked poses of the template peptide on the spike protein RBD surface.

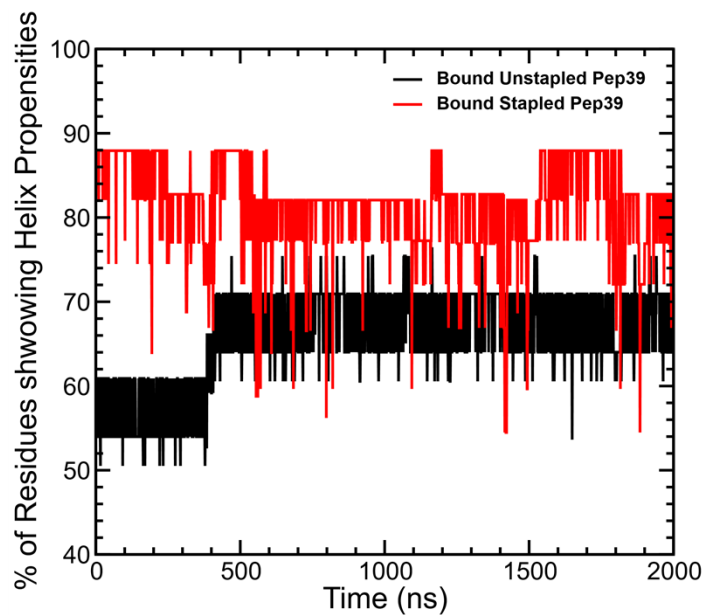

**Figure–S2** The percentage of residues showing  $\alpha$  Helix propensities for stapled and unstapled peptide in the bound state.

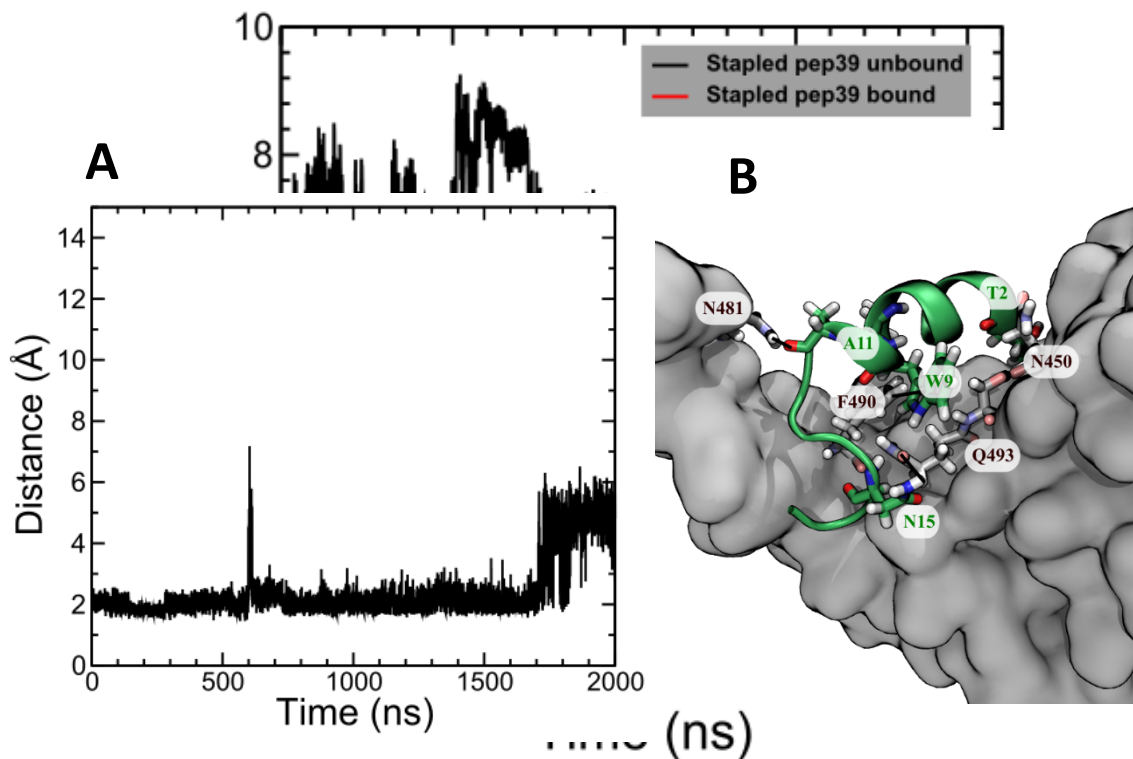

**Figure-S4 (A)** Distance of the pep39 from the ACE2 binding site on the spike protein RBD. **(B)** 3D view of the interaction between designed peptide and spike protein RBD.

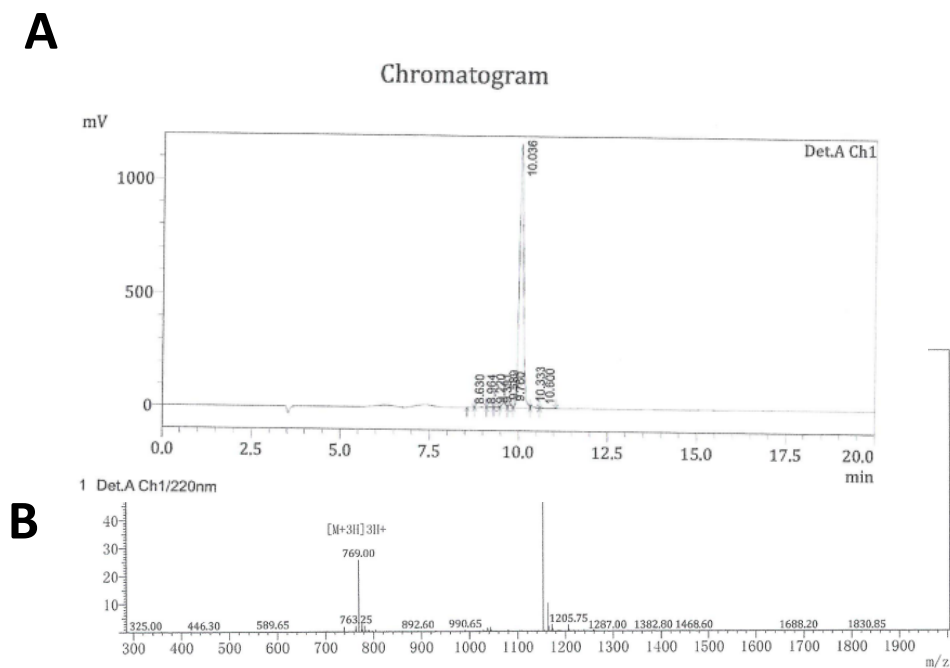

**Figure-S5 (A)** HPLC chromatogram and **(B)** MS spectrum graph of the stapled peptide



**Table-S2:** Optimized peptide sequences with time remaining bound during the MD simulation for stapled and unstapled peptides and the estimated binding free energy by MM-GBSA method

| Sl. No | ID       | Time Bound (ns) |           | Rough Estimate of Binding Energy by MMGBSA (kcal/mol) |                     | Absolute Binding Free Energy (Stapled) (kcal/mol) |
|--------|----------|-----------------|-----------|-------------------------------------------------------|---------------------|---------------------------------------------------|
|        |          | Stapled         | Unstapled | Stapled                                               | Unstapled           |                                                   |
| 1      | Ngu-123  | 2000            | 189.4     | $-24.958 \pm 0.063$                                   | $-24.958 \pm 0.063$ | NA                                                |
| 2      | Ngu-335  | 1547            | 342       | $-28.557 \pm 0.106$                                   | $-29.252 \pm 0.217$ | NA                                                |
| 3      | Ngu-129  | 2000            | 2000.0    | $-29.000 \pm 0.072$                                   | $-34.147 \pm 0.097$ | NA                                                |
| 4      | Ngu-129a | 371             |           | $-18.303 \pm 0.144$                                   |                     | NA                                                |
| 5      | Ngu-29   | 2000            | 1253.8    | $-33.970 \pm 0.119$                                   | $-45.021 \pm 0.153$ | $-05.02 \pm 15.37$                                |
| 6      | Ngu-29a  | 162             |           | $-14.611 \pm 0.901$                                   |                     | NA                                                |
| 7      | Ngu-29b  | 2000            |           | $-44.746 \pm 0.122$                                   |                     | $-13.31 \pm 01.63$                                |
| 8      | Ngu29c   | 77.6            |           | $-12.620 \pm 0.455$                                   |                     | NA                                                |
| 9      | Ta-93    | 1398.8          | 198.0     | $-33.945 \pm 0.151$                                   | $-36.851 \pm 0.518$ | $-17.41 \pm 03.10$                                |
| 10     | Ta-200   | 18.2            | 1421.0    | $-13.137 \pm 0.491$                                   | $-29.714 \pm 0.085$ | NA                                                |
| 11     | Ta-196   | 415.4           | 1032.80   | $-21.832 \pm 0.213$                                   | $-28.023 \pm 0.178$ | NA                                                |
| 12     | Ta-26    | 189.8           | 2000      | $-29.407 \pm 0.259$                                   | $-28.882 \pm 0.092$ | NA                                                |
| 13     | pep-39   | 2028.8          | 1350.8    | $-33.936 \pm 0.071$                                   | $-29.688 \pm 0.122$ | $-26.32 \pm 08.64$                                |
| 14     | pep-39a  | 2000            |           | $-28.884 \pm 0.055$                                   |                     | NA                                                |
| 15     | pep-39us | 1222            |           | $-27.037 \pm 0.076$                                   |                     | NA                                                |
